# Supplementary material for: Optical, electrochemical and photophysical analyses of heteroleptic luminescent Ln(iii) complexes for lighting applications
Source: Royal Society of Chemistry journal article supplement (doi:10.1039/d3ra00214d), 2023-01-01
Supplement: d3ra00214d1.pdf [file d3ra00214d1.pdf]

## Optical, Electrochemical and Photophysical Analyses of Heteroleptic Luminescent Ln(III) Complexes for Lighting Applications

Anjali Hooda<sup>a</sup>, Devender Singh<sup>a\*</sup>, Anuj Dalal<sup>a</sup>, Kapeesha Nehra<sup>a</sup>, Sumit Kumar<sup>b</sup>,  
Rajender Singh Malik<sup>b</sup>, Ramesh Kumar<sup>c</sup> and Parvin Kumar<sup>c</sup>

<sup>a</sup>Department of Chemistry, Maharshi Dayanand University, Rohtak-124001, India.

<sup>b</sup>Department of Chemistry, DCR University of Science & Technology, Murthal, Haryana 131039, India.

<sup>c</sup>Department of Chemistry, Kurukshetra University Kurukshetra, -136119, Haryana, India.

## Electronic Supporting Information

**Table S1** Energy transfer parameters of Hfodo and substituted 2,2'-bipyridine derivatives

| Ligand | E <sub>S1</sub> | E <sub>T1</sub> | ΔE <sub>(S1-T1)</sub> | ΔE <sub>(T1-5D4 of Tb3+)</sub> | ΔE <sub>(T1-4G5/2 of Sm3+)</sub> |
|--------|-----------------|-----------------|-----------------------|--------------------------------|----------------------------------|
| Hfodo  | 29,154          | 22,500          | 6,654                 | 2,134                          | 4,833                            |
| Bpy    | 29,673          | 22,883          | 6,790                 | 2,517                          | 5,216                            |
| DBr    | 31,152          | 23,696          | 7,456                 | 3,330                          | 6,029                            |
| MD     | 25,706          | 20,161          | 5,545                 | -205                           | 2,494                            |
| DD     | 22,727          | 18,315          | 4,412                 | -2051                          | 648                              |

**Table S2** Percentage branching ratio of various transitions involved in T1-T4

| Complex | Percentage branching ratio of transitions |                                                           |                                                           |                                                           |                                                           |                                                               |
|---------|-------------------------------------------|-----------------------------------------------------------|-----------------------------------------------------------|-----------------------------------------------------------|-----------------------------------------------------------|---------------------------------------------------------------|
|         | Ligand                                    | <sup>5</sup> D <sub>4</sub> → <sup>7</sup> F <sub>6</sub> | <sup>5</sup> D <sub>4</sub> → <sup>7</sup> F <sub>5</sub> | <sup>5</sup> D <sub>4</sub> → <sup>7</sup> F <sub>4</sub> | <sup>5</sup> D <sub>4</sub> → <sup>7</sup> F <sub>3</sub> | <sup>5</sup> D <sub>4</sub> → <sup>7</sup> F <sub>2,1,0</sub> |
| T1      | -                                         | 18.06                                                     | 64.09                                                     | 10.94                                                     | 6.26                                                      | 0.64                                                          |
| T2      | -                                         | 17.35                                                     | 68.63                                                     | 8.29                                                      | 5.32                                                      | 0.40                                                          |
| T3      | -                                         | 21.40                                                     | 59.92                                                     | 12.11                                                     | 6.21                                                      | 0.35                                                          |
| T4      | -                                         | 23.19                                                     | 63.90                                                     | 8.69                                                      | 3.77                                                      | 0.44                                                          |

**Table S3** Percentage branching ratio of various transitions involved in S1-S4

| Complex | Percentage branching ratio of transitions |                                                               |                                                               |                                                               |                                                                |
|---------|-------------------------------------------|---------------------------------------------------------------|---------------------------------------------------------------|---------------------------------------------------------------|----------------------------------------------------------------|
|         | Ligand                                    | <sup>4</sup> G <sub>5/2</sub> → <sup>6</sup> H <sub>5/2</sub> | <sup>4</sup> G <sub>5/2</sub> → <sup>6</sup> H <sub>7/2</sub> | <sup>4</sup> G <sub>5/2</sub> → <sup>6</sup> H <sub>9/2</sub> | <sup>4</sup> G <sub>5/2</sub> → <sup>6</sup> H <sub>11/2</sub> |
| S1      | -                                         | 6.52                                                          | 24.91                                                         | 65.79                                                         | 2.77                                                           |
| S2      | -                                         | 2.28                                                          | 21.45                                                         | 75.41                                                         | 0.01                                                           |
| S3      | 66.74                                     | 1.97                                                          | 7.35                                                          | 21.87                                                         | 2.06                                                           |
| S4      | 67.96                                     | 2.35                                                          | 6.69                                                          | 22.43                                                         | 0.06                                                           |

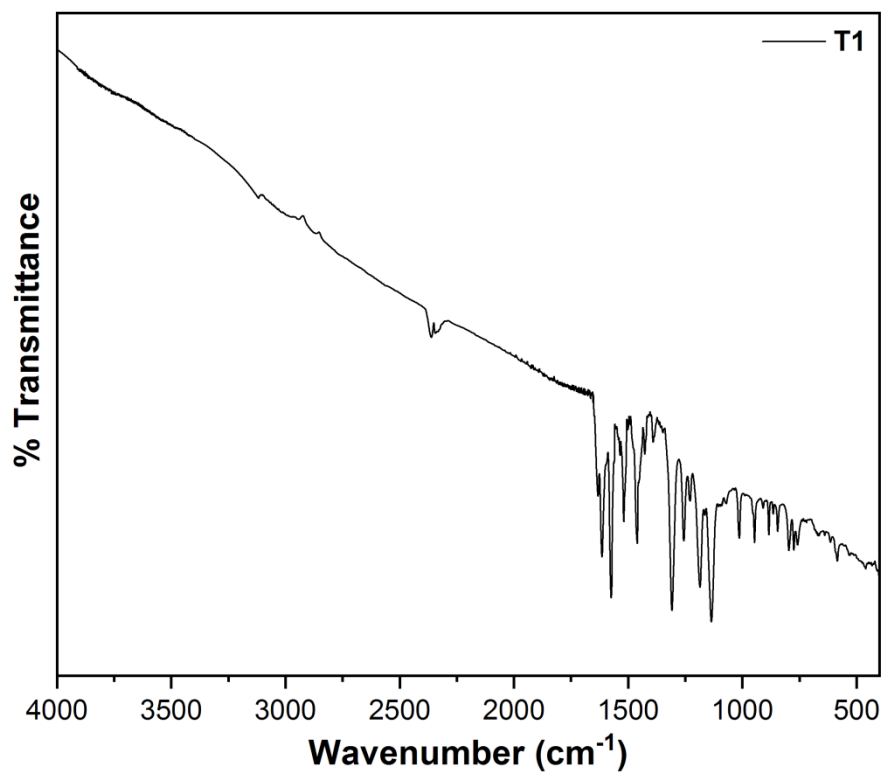

Fig. S1 IR spectrum of T1

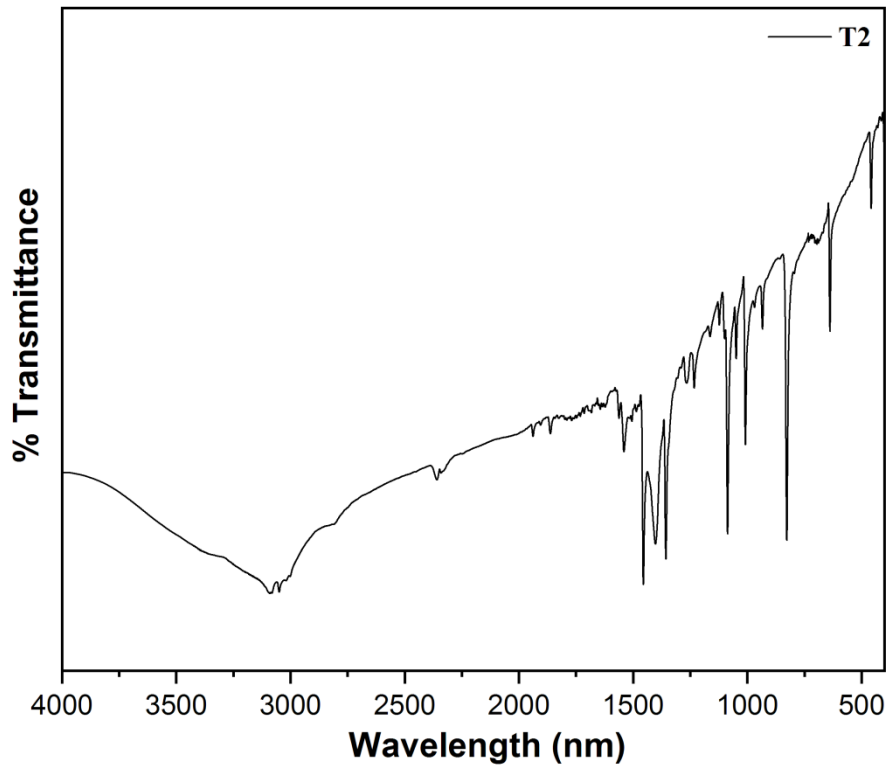

Fig. S2 IR spectrum of T2

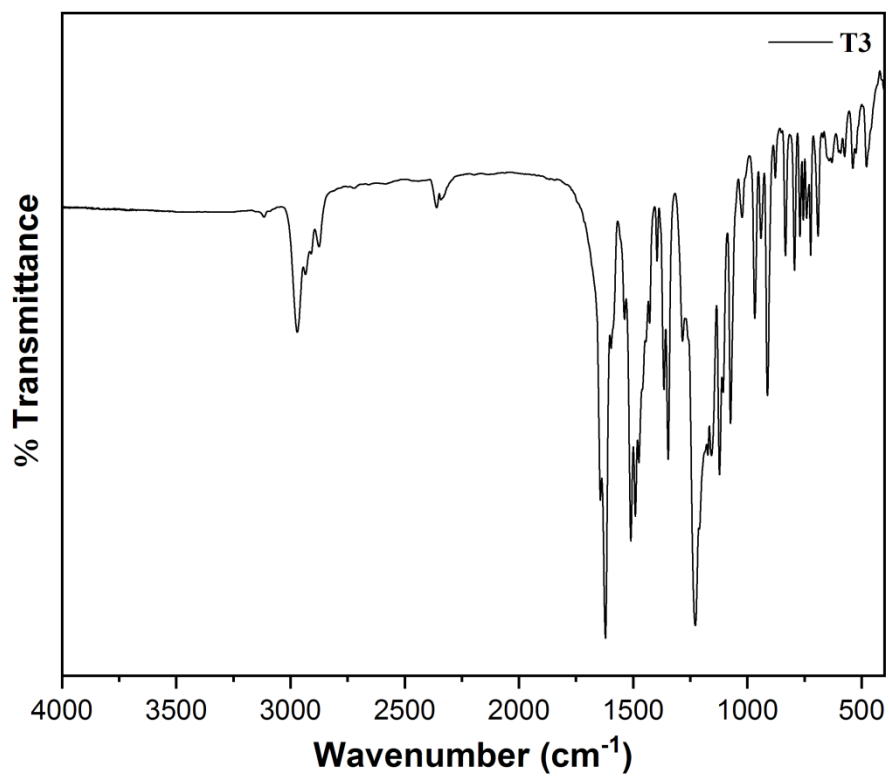

**Fig. S3** IR spectrum of T3

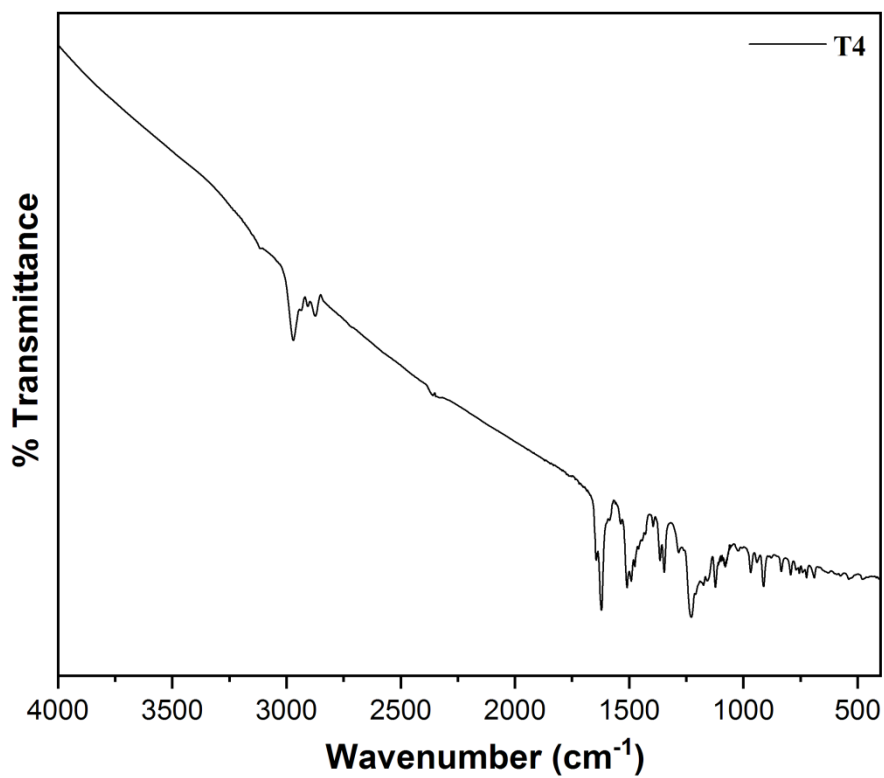

**Fig. S4** IR spectrum of T4

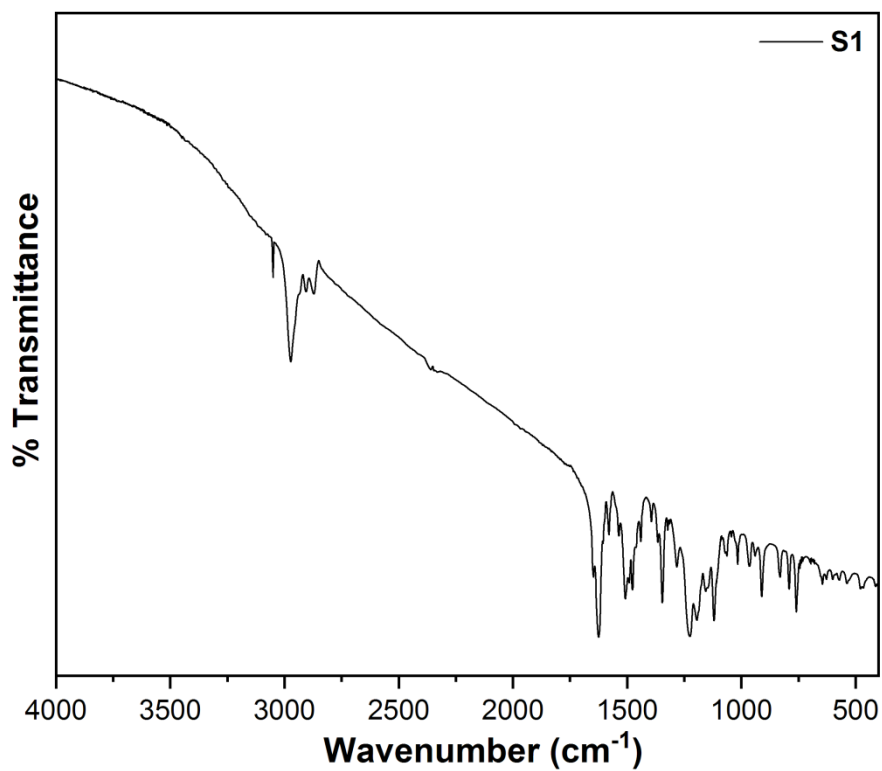

Fig. S5 IR spectrum of S1

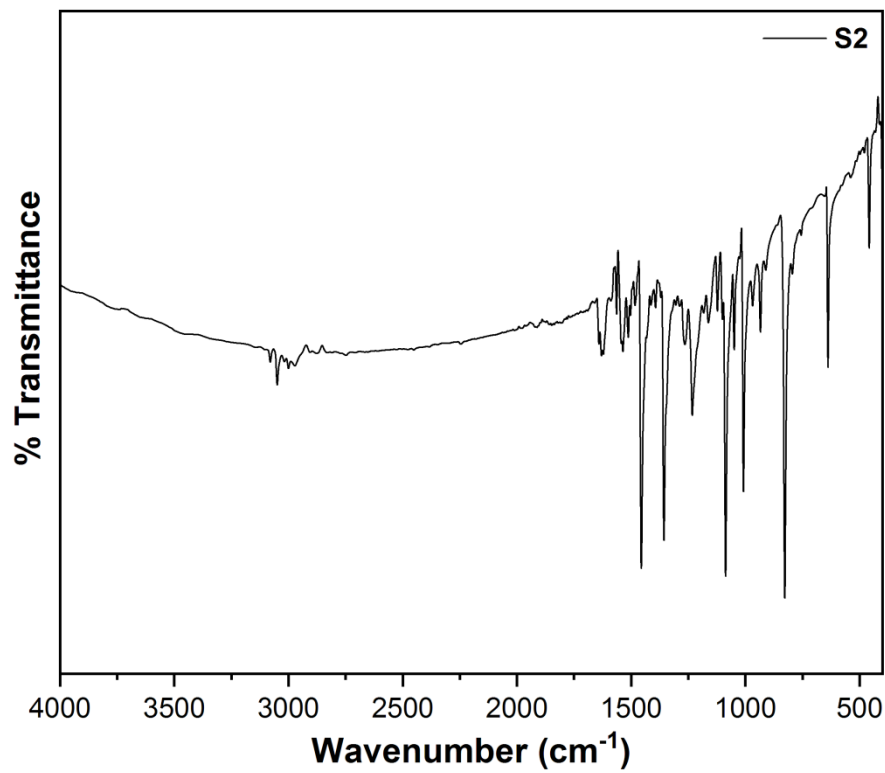

Fig. S6 IR spectrum of S2

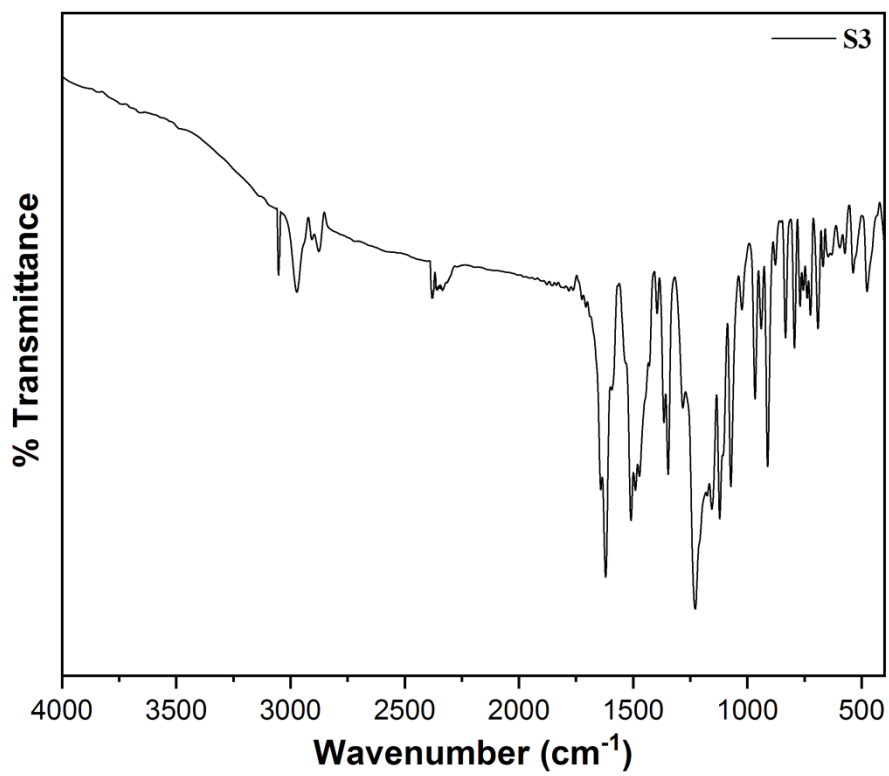

**Fig. S7** IR spectrum of S3

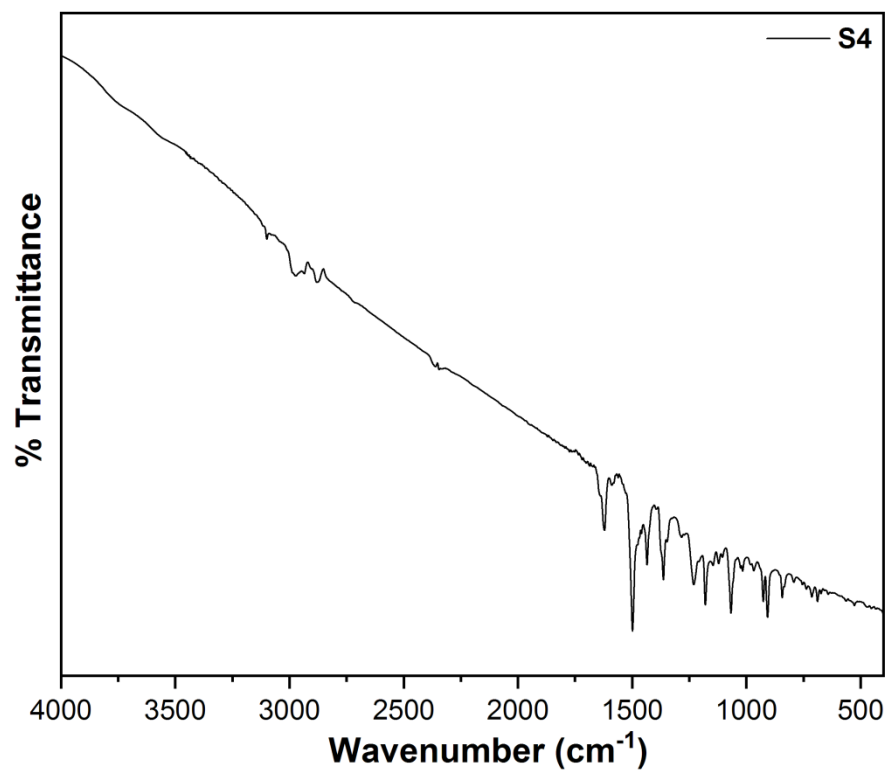

**Fig. S8** IR spectrum of S4

Feb14-2023.50.fid  
5  
1H\_8scan CDCl3 {D:\Spectra} nmr 5

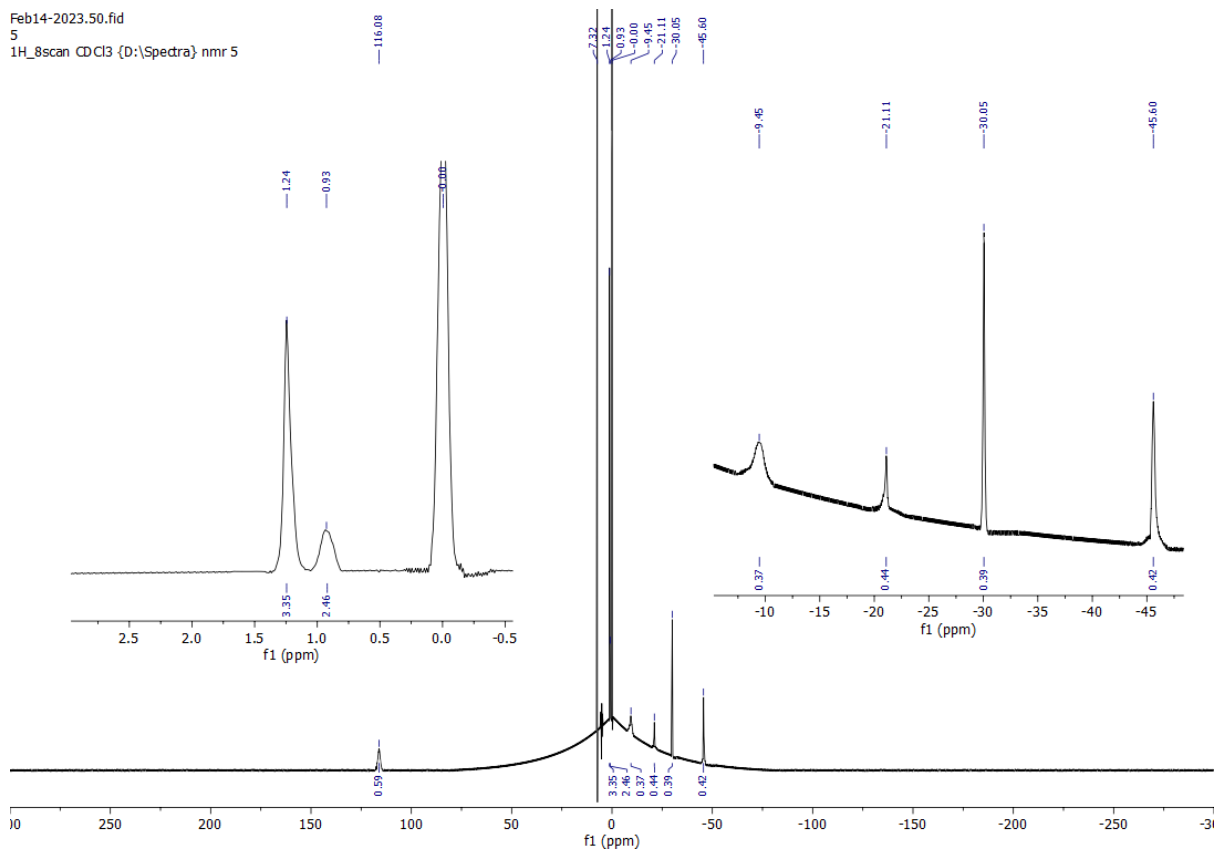

Fig. S9 NMR spectrum of T1

Feb14-2023.60.fid  
6  
1H\_8scan CDCl3 {D:\Spectra} nmr 6

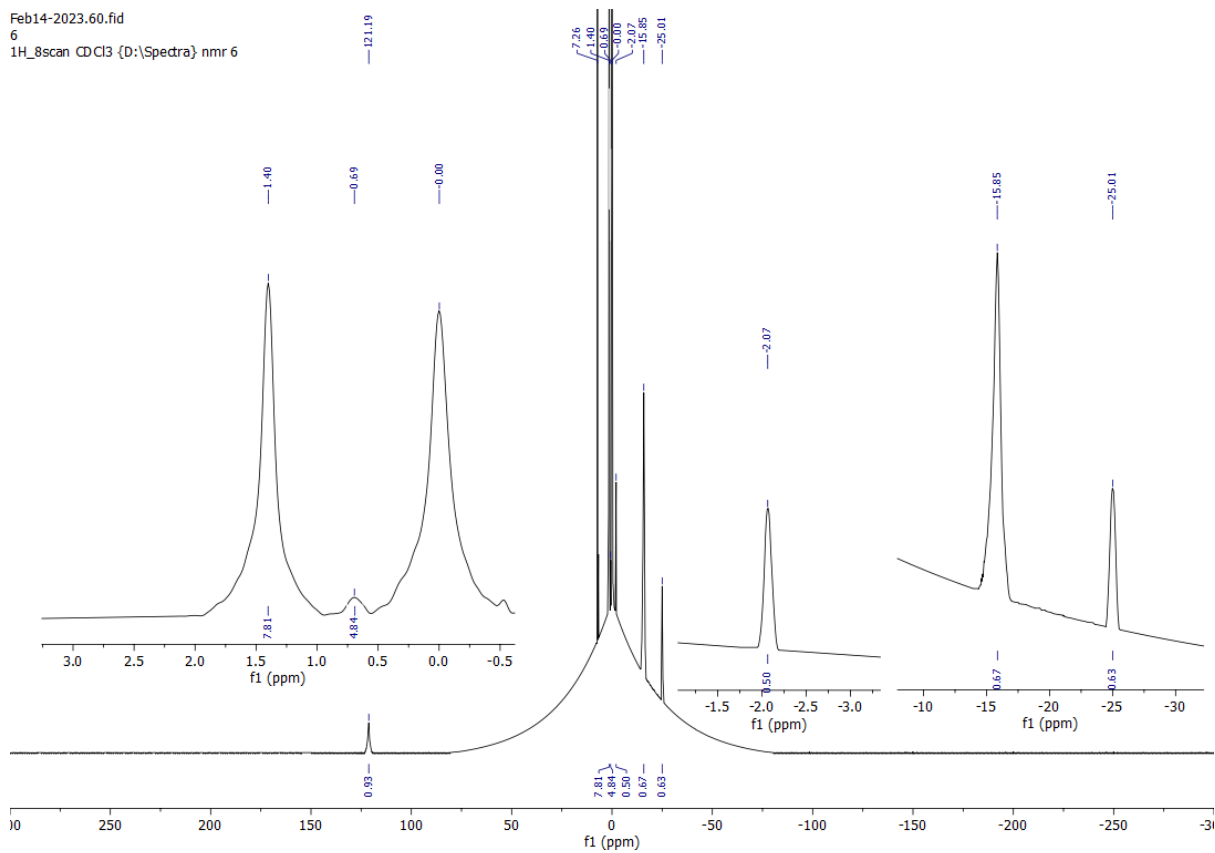

Fig. S10 NMR spectrum of T2



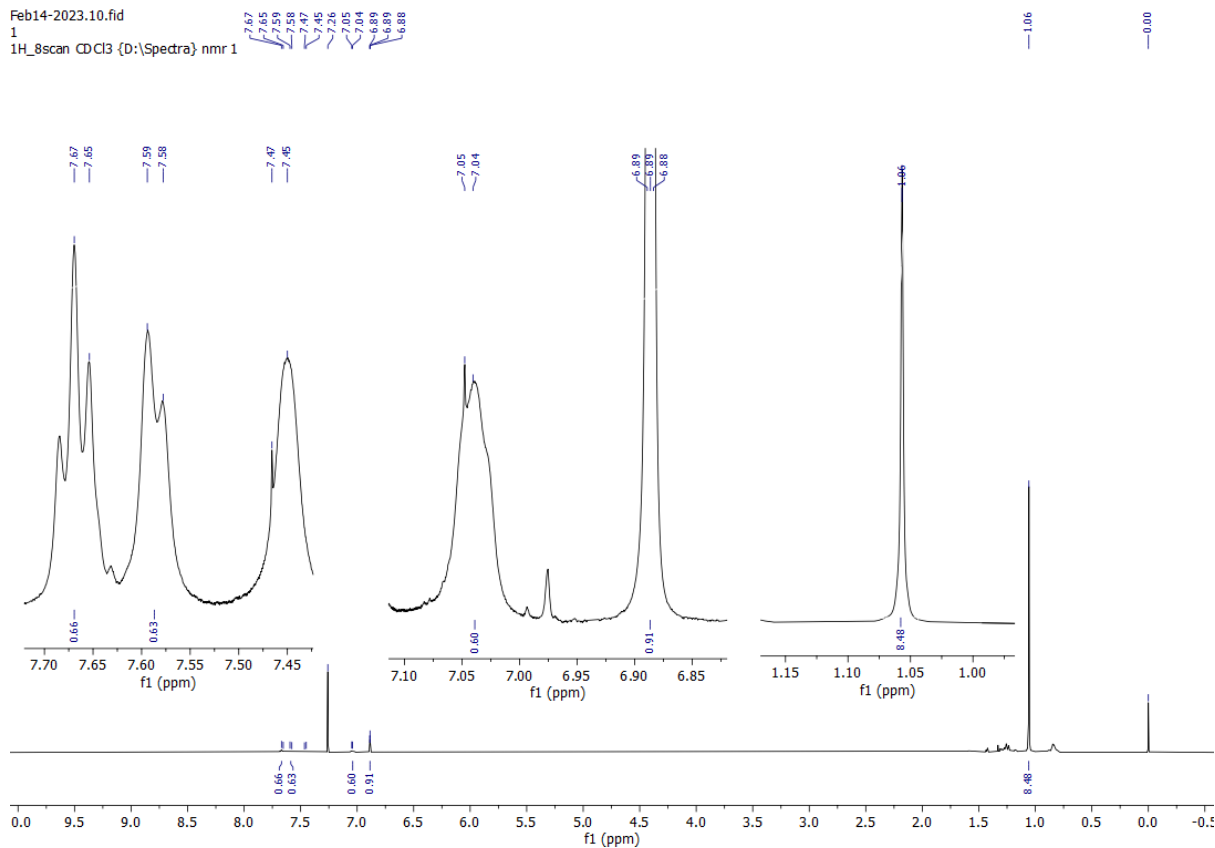

Fig. S13 NMR spectrum of S1

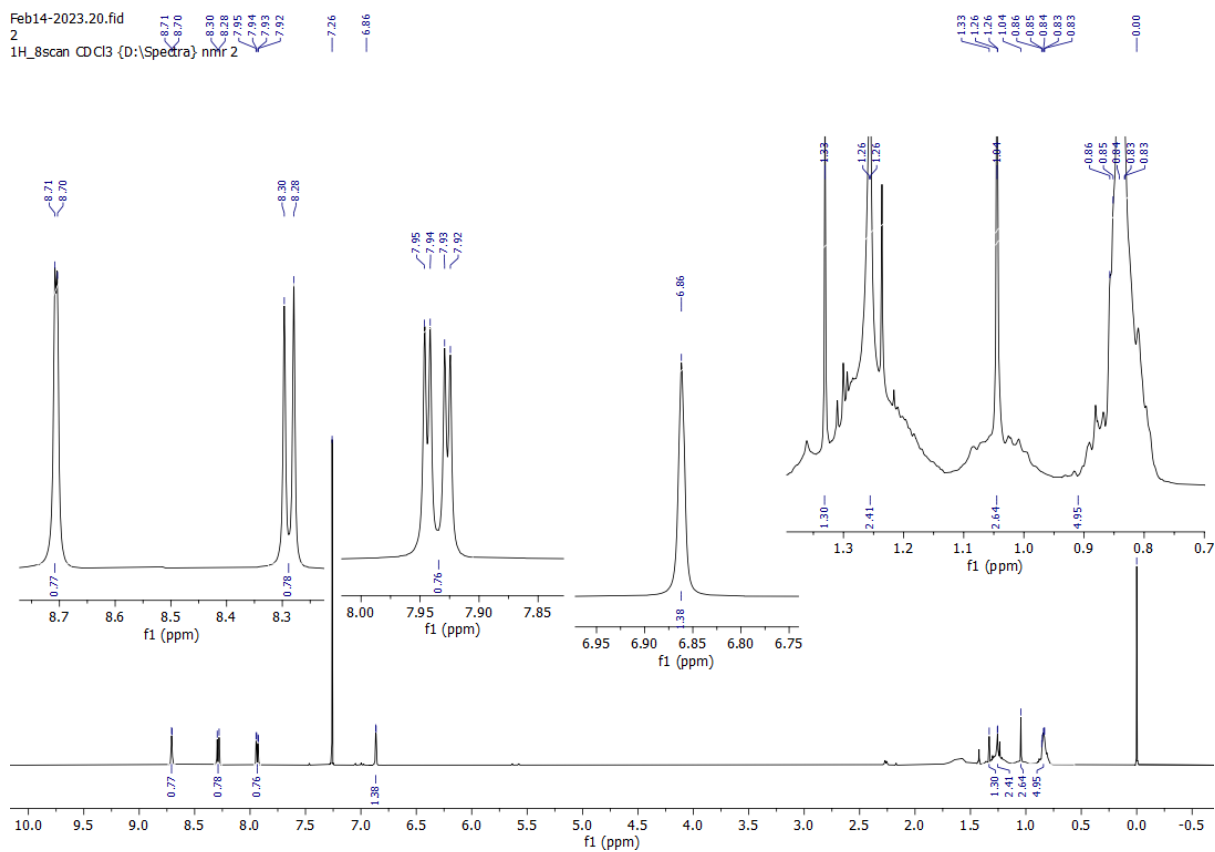

Fig. S14 NMR spectrum of S2



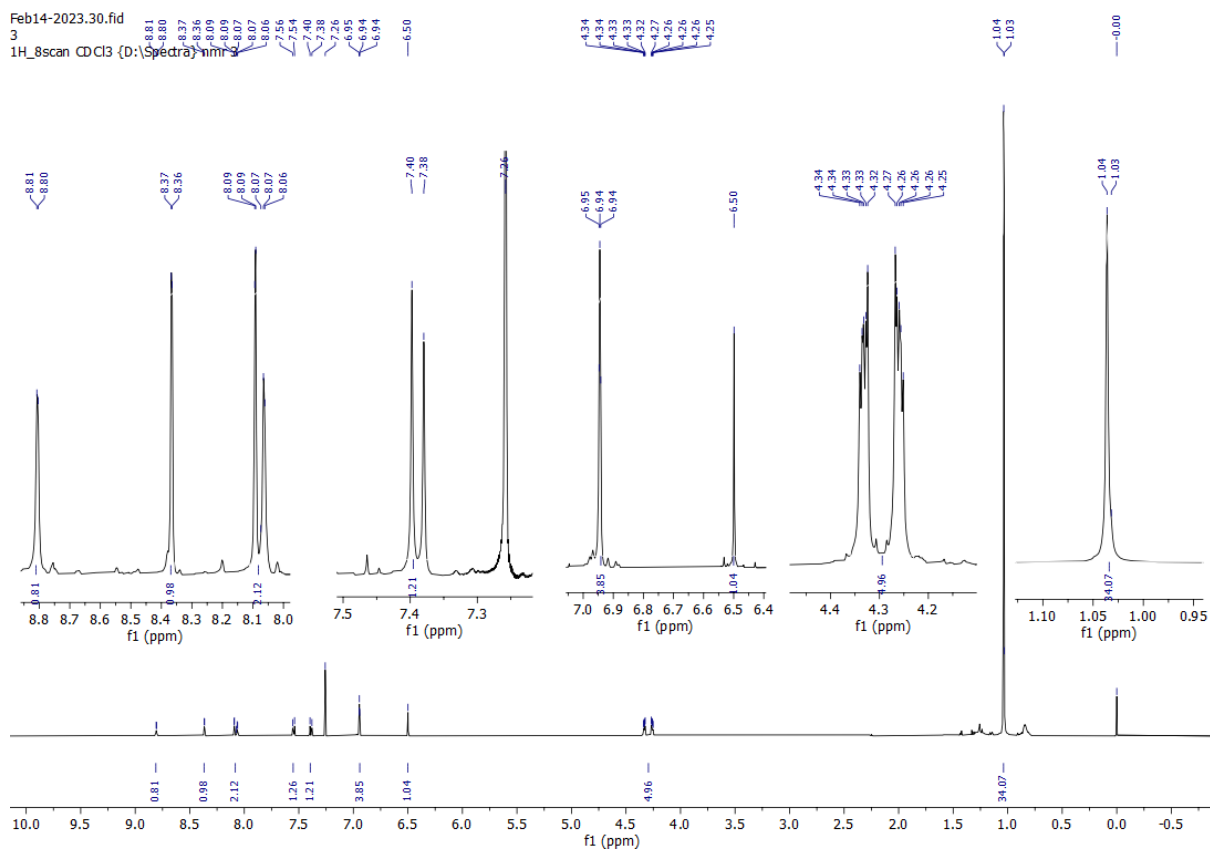

Fig. S15 NMR spectrum of S3

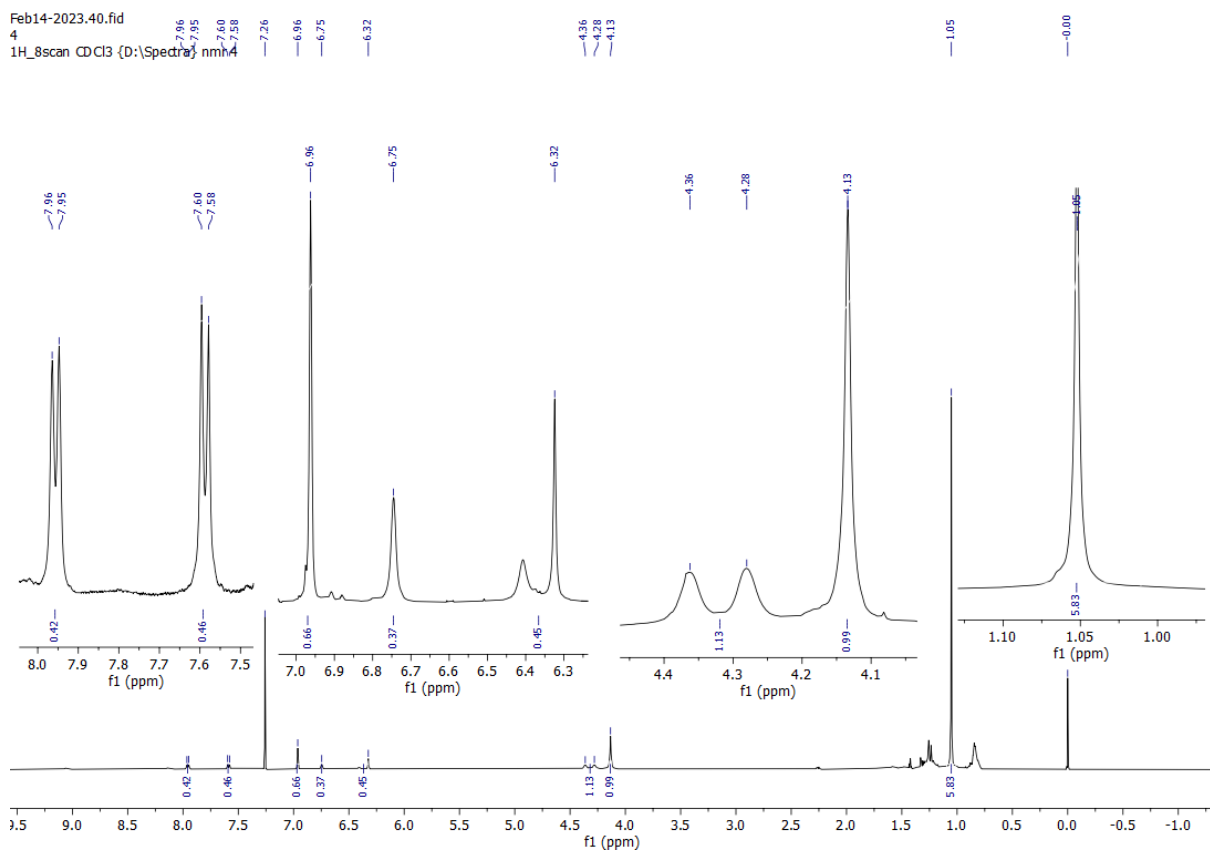

Fig. S16 NMR spectrum of S4

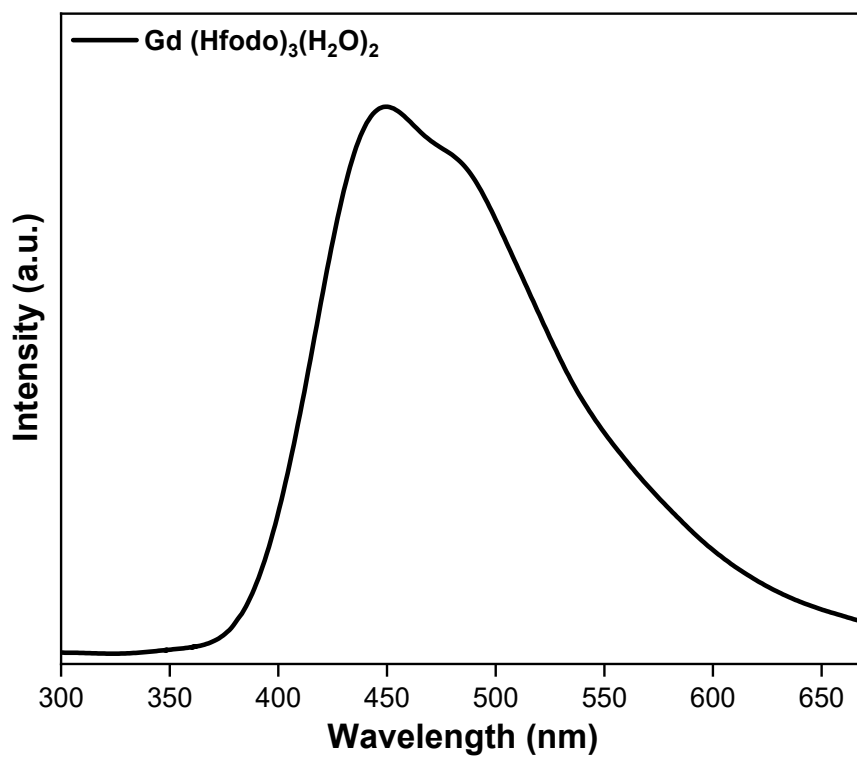

**Fig. S17** Phosphorescence spectrum of  $[Gd(Hfodo)_3(H_2O)_2]$
